# Supplementary material for: Interface-mediated hygroelectric generator with an output voltage approaching 1.5 volts
Source: PubMed Central journal article supplement (PMC6177432; doi:10.1038/s41467-018-06633-z), 2018-10-09
Supplement: 41467_2018_6633_MOESM3_ESM.pdf [file 41467_2018_6633_MOESM3_ESM.pdf]

## **Description of Additional Supplementary Files**

**File Name:** Supplementary Movie 1

**Description:** The demonstration of hygroelectric generator package as a practical power source for feeding commercial electronics. The “THU” pattern consisted of 19 commercial LEDs in series is lighted by periodically switching on the designed power-supplying system.
